# Supplementary material for: Environmental Noise Exposure and Sleep Habits among Children in a Cohort from Northern Spain
Source: MDPI journal article supplement (doi:10.3390/ijerph192316321), 2022-12-06
Supplement: s1 [file s1]

**Appendix SA: Ad hoc questionnaires used in the study. Original questionnaires were in Spanish or Basque.**

SA1. Questionnaire used to assess perceived sleep variables.

**SLEEP HABITS**

Instructions: The following questions are related to your child's sleep habits. Try to remember what has happened IN THE PAST YEAR as accurately as possible for most days and nights. Please answer all questions.

|                                                                                                                                                            | a. Weekdays   | b. Non-working days or weekends |
|------------------------------------------------------------------------------------------------------------------------------------------------------------|---------------|---------------------------------|
| 81. At what time does he/she usually go to bed at night?                                                                                                   | ____h ____min | ____h ____min                   |
| 82. Considering that he/she can stay awake for some time in bed (e.g., reading), at what time does he/she turn off the light and are ready to go to sleep? | ____h ____min | ____h ____min                   |
| 83. How many minutes does it usually take him/her to fall asleep each night?                                                                               | ____min       | ____min                         |
| 84. At what time does he/she usually get up in the morning?                                                                                                | ____h ____min | ____h ____min                   |

SA2. Stressful family events questionnaire.

**STRESSFUL FAMILY EVENTS**

Instructions: Some of the following questions refer to events that are very important to the child. Please indicate if the following events have taken place throughout your child's life.

|                                     | Yes                      | No                       |
|-------------------------------------|--------------------------|--------------------------|
| 146. Residence change               | <input type="checkbox"/> | <input type="checkbox"/> |
| 147. School change                  | <input type="checkbox"/> | <input type="checkbox"/> |
| 148. Parents' separation or divorce | <input type="checkbox"/> | <input type="checkbox"/> |
| 149. Death of a family member       | <input type="checkbox"/> | <input type="checkbox"/> |
| 150. Long-term hospitalization      | <input type="checkbox"/> | <input type="checkbox"/> |

SA3. Questionnaire about physical activity. Example of the questionnaire used is presented: Apart from the 4 exercises presented in the example, other 27 are also presented: Football, swimming, riding a horse, riding the bicycle, running, playing tennis, etc.

### PHYSICAL ACTIVITIES

Instructions: The following questions are related to your child's physical activities. **In a typical week, how many minutes does your child spend doing the following physical activities per day on a typical week (excluding school trips)?** Please, explain for each exercise the day of the week and time he/she spend doing it.

EXAMPLE: Your child does the following physical exercises: (1) Basketball training on Monday and Wednesday during 90 minutes and on Saturday a 60 minutes long match. (2) On Saturday she/he goes for a walk in the mountain (3) Dances on Tuesday and Thursday during 30 min, (4) on Tuesday and Thursday plays active videogames in the Wii, 60 minutes each day

| Exercise                      | Week day            |                      |                        |                       |                     |                       |                     |
|-------------------------------|---------------------|----------------------|------------------------|-----------------------|---------------------|-----------------------|---------------------|
|                               | Monday<br>(minutes) | Tuesday<br>(minutes) | Wednesday<br>(minutes) | Thursday<br>(minutes) | Friday<br>(minutes) | Saturday<br>(minutes) | Sunday<br>(minutes) |
| Go for a walk in the mountain |                     |                      |                        |                       |                     | 120                   |                     |
| Basketball                    | 90                  |                      | 90                     |                       |                     | 60                    |                     |
| Dance                         |                     | 30                   |                        | 30                    |                     |                       |                     |
| Play active videogames/Wii    |                     | 60                   |                        | 60                    |                     |                       |                     |

## Appendix SB: Descriptive statistics

Table SB1. Descriptive statistics of the numerical covariables present in the study

| Variable                                                                | N   | Mean  | SD    | Min   | Q1    | Median | Q3    | Max    | IQR    |
|-------------------------------------------------------------------------|-----|-------|-------|-------|-------|--------|-------|--------|--------|
| Age                                                                     | 377 | 10.8  | 0.2   | 10.2  | 10.7  | 10.8   | 11.0  | 11.8   | 0.3    |
| Maternal age                                                            | 375 | 43.47 | 3.19  | 35.49 | 41.25 | 42.87  | 45.54 | 54.31  | 4.29   |
| Number of recorded nights                                               | 135 | 6.16  | 1.49  | 1.00  | 6.00  | 7.00   | 7.00  | 7.00   | 1.00   |
| Hair cortisol concentration (pg/mg)                                     | 346 | 11.13 | 13.10 | 1.25  | 7.21  | 8.62   | 11.15 | 160.00 | 152.79 |
| BMI (kg/m <sup>2</sup> )                                                | 374 | 18.9  | 3.2   | 10.7  | 16.8  | 18.4   | 20.50 | 30.6   | 3.7    |
| Psychological well-being (KIDSCREEN-27)                                 | 377 | 2.5   | 1.2   | 0.6   | 1.8   | 2.5    | 3.6   | 4.9    | 1.9    |
| School environment (KIDSCREEN-27)                                       | 377 | 2.7   | 1.4   | 0.2   | 2.0   | 2.6    | 3.3   | 4.7    | 1.4    |
| Personal psychological skills (SDQ)                                     | 372 | 13.3  | 3.9   | 6.0   | 10.0  | 13.0   | 15.0  | 27.0   | 5.0    |
| Objective Moderate/Vigorous physical activity (Actigraph, min/day)      | 135 | 82.7  | 29.5  | 25.2  | 62.1  | 76.8   | 100.3 | 167.9  | 38.3   |
| Subjective Moderate/Vigorous physical activity (Questionnaire, min/day) | 374 | 112.6 | 29.5  | 8.6   | 68.6  | 98.5   | 137.9 | 462.9  | 69.3   |

Table SB2. Sleep habits means for categorical variable groups. For each group, sample size (N), frequencies and nocturnal sleep/sleep period and sleep latency means are shown both parental reported and measured by actigraph.

|                                                               |           | Measured by Actigraph    |                        | Parental reported     |                        |
|---------------------------------------------------------------|-----------|--------------------------|------------------------|-----------------------|------------------------|
|                                                               |           | Nocturnal Sleep (h) (SD) | Sleep Latency (h) (SD) | Sleep period (h) (SD) | Sleep Latency (h) (SD) |
| Sex                                                           | Male      | 7.81 (0.62)              | 1.39 (0.40)            | 9.42 (0.62)           | 0.76 (0.35)            |
|                                                               | Female    | 7.67 (0.54)              | 1.41 (0.46)            | 9.33 (0.50)           | 0.93 (0.41)            |
| Neighbourhood SES                                             | I Higher  | 7.96 (0.57)              | 1.47 (0.29)            | 9.51 (0.59)           | 0.78 (0.43)            |
|                                                               | II        | 7.75 (0.64)              | 1.32 (0.41)            | 9.38 (0.46)           | 0.87 (0.38)            |
|                                                               | III       | 7.66 (0.62)              | 1.48 (0.49)            | 9.31 (0.47)           | 0.86 (0.42)            |
|                                                               | IV        | 7.75 (0.50)              | 1.35 (0.30)            | 9.43 (0.47)           | 0.82 (0.36)            |
| Number of stressful events                                    | V Lower   | 8.08 (0.45)              | 1.74 (0.91)            | 9.38 (0.43)           | 0.84 (0.39)            |
|                                                               | 0         | 7.67 (0.62)              | 1.43 (0.46)            | 9.36 (0.46)           | 0.85 (0.40)            |
|                                                               | 1         | 7.82 (0.59)              | 1.38 (0.43)            | 9.40 (0.51)           | 0.89 (0.42)            |
|                                                               | 2 or more | 7.80 (0.53)              | 1.30 (0.35)            | 9.36 (0.46)           | 0.78 (0.30)            |
| Smartphone (computer, tablet) usage at bedtime (SCTUB)        | No        | 7.69 (0.53)              | 1.46 (0.47)            | 9.43 (0.48)           | 0.85 (0.43)            |
|                                                               | Yes       | 7.74 (0.62)              | 1.38 (0.43)            | 9.35 (0.47)           | 0.85 (0.39)            |
| Smartphone (computer, tablet) usage during the night (SCTUDN) | No        | 7.74 (0.60)              | 1.39 (0.44)            | 9.39 (0.48)           | 0.85 (0.40)            |
|                                                               | Yes       | 7.64 (0.63)              | 1.40 (0.44)            | 9.30 (0.46)           | 0.86 (0.32)            |

|                          |     |             |             |             |             |
|--------------------------|-----|-------------|-------------|-------------|-------------|
| <i>Victim propensity</i> | No  | 7.73 (0.60) | 1.42 (0.44) | 9.36 (0.47) | 0.86 (0.39) |
|                          | Yes | 7.80 (0.66) | 1.17 (0.35) | 9.48 (0.47) | 0.78 (0.39) |
| <i>Bully/victim</i>      | No  | 7.72 (0.60) | 1.40 (0.43) | 9.37 (0.48) | 0.85 (0.39) |
|                          | Yes | 8.14 (0.30) | 1.23 (0.80) | 9.50 (0.26) | 0.91 (0.17) |

---

## Appendix SC: Correlation table

Table SC1. Correlations between response variables

| Variable pair             |                           | t-value | d.f. | p-value   | Pearson corr. r | 95% C.I. for r     |
|---------------------------|---------------------------|---------|------|-----------|-----------------|--------------------|
| Time In Bed               | Nocturnal Sleep           | 13.136  | 133  | <0.001*** | 0.75            | (0.667, 0.817)     |
| Time In Bed               | Sleep Latency             | 5.53    | 133  | <0.001*** | 0.43            | (0.284, 0.560)     |
| Time In Bed               | Sleep Efficiency          | -2.26   | 133  | 0.012**   | -0.21           | (-0.369, -0.047)   |
| Time In Bed               | Diurnal Rest              | -3.96   | 133  | <0.001*** | -0.325          | (-0.468, -0.165)   |
| Nocturnal Sleep           | Sleep Latency             | -3.233  | 133  | 0.002**   | -0.27           | (-0.419, -0.106)   |
| Nocturnal Sleep           | Sleep Efficiency          | 6.318   | 133  | <0.001*** | 0.48            | (-0.339, -0.600)   |
| Nocturnal Sleep           | Diurnal Rest              | -5.28   | 133  | <0.001*** | -0.42           | (-0.547, -0.266)   |
| Sleep Latency             | Sleep Efficiency          | -45.14  | 133  | <0.001*** | -0.969          | (-0.977, -0.956)   |
| Sleep Latency             | Diurnal Rest              | 1.095   | 133  | 0.27      | 0.09            | (-0.07, -0.26)     |
| Sleep Efficiency          | Diurnal Rest              | -2.37   | 133  | 0.019**   | -0.2            | (-0.35, -0.033)    |
| Reported Time In Bed      | Reported Sleep Period     | 14.24   | 365  | <0.001*** | 0.6             | (0.53, 0.65)       |
| Reported Time In Bed      | Reported Sleep Latency    | 6.32    | 364  | <0.001*** | 0.31            | (0.219, 0.404)     |
| Reported Time In Bed      | Reported Sleep Efficiency | -4.54   | 364  | <0.001*** | -0.23           | (-0.33, -0.132)    |
| Reported Sleep Period     | Reported Sleep Latency    | -12.9   | 364  | <0.001*** | -0.56           | (-0.627, -0.486)   |
| Reported Sleep Period     | Reported Sleep Efficiency | 15.43   | 364  | <0.001*** | 0.629           | (0.562, 0.688)     |
| Reported Sleep Efficiency | Reported Sleep Latency    | -204.0  | 364  | <0.001*** | -0.996          | (-0.9964, -0.9946) |
| Time In Bed               | Reported Time In Bed      | 0.462   | 131  | 0.645     | 0.04            | (-0.13, 0.209)     |
| Nocturnal Sleep           | Reported Sleep Period     | -0.106  | 132  | 0.915     | -0.009          | (-0.179, 0.161)    |
| Sleep Latency             | Reported Sleep Latency    | 0.904   | 130  | 0.368     | 0.08            | (-0.09, 0.247)     |
| Sleep Efficiency          | Reported Sleep Efficiency | 0.76    | 130  | 0.45      | 0.067           | (-0.116, 0.235)    |

Note: \*\*p<0.01; \*\*\*p<0.001

**Appendix SD: DAGgity code for the current model.**

```
dag {  
  bb="-0.5,-0.5,0.5,0.5"  
  "Cortisol levels" [pos="0.154,-0.241"]  
  "Environmental Noise" [exposure,pos="-0.380,0.188"]  
  "Family legacy" [latent,pos="-0.275,0.352"]  
  "Historical legacy" [latent,pos="-0.424,-0.439"]  
  "Physical activity" [pos="0.076,0.410"]  
  "Psychological well-being" [pos="0.072,0.024"]  
  "School environment" [pos="-0.063,-0.450"]  
  "Sleep habits" [outcome,pos="0.421,0.182"]  
  "Smartphone usage" [pos="0.445,-0.150"]  
  "Stressful events" [pos="0.396,-0.335"]  
  "Urban Planning" [latent,pos="-0.430,-0.127"]  
  BMI [pos="0.228,0.244"]  
  Bullying [pos="-0.224,-0.217"]  
  SES [pos="-0.135,0.106"]  
  Sex [pos="0.302,-0.447"]  
  "Cortisol levels" -> "Sleep habits"  
  "Environmental Noise" -> "Cortisol levels"  
  "Environmental Noise" -> "Sleep habits"  
  "Family legacy" -> SES  
  "Historical legacy" -> "Urban Planning"  
  "Physical activity" -> "Cortisol levels"  
  "Physical activity" -> "Sleep habits"  
  "Physical activity" -> BMI  
  "Psychological well-being" -> "Cortisol levels"  
  "Psychological well-being" -> "Sleep habits"  
  "School environment" -> "Psychological well-being"  
  "School environment" -> Bullying  
  "Smartphone usage" -> "Sleep habits"  
  "Stressful events" -> "Cortisol levels"  
  "Stressful events" -> "Psychological well-being"  
  "Stressful events" -> "Sleep habits"
```

"Urban Planning" -> "Environmental Noise"

BMI -> "Cortisol levels"

BMI -> Bullying

Bullying -> "Cortisol levels"

Bullying -> "Psychological well-being"

Bullying -> "Sleep habits"

SES -> "Cortisol levels"

SES -> "Environmental Noise"

SES -> "Physical activity"

SES -> "Psychological well-being"

SES -> "Sleep habits"

SES -> BMI

SES -> Bullying

Sex -> "Cortisol levels"

Sex -> "Physical activity"

Sex -> "Sleep habits"

Sex -> Bullying

}

## Appendix SE: Testable implications for the actigraphic data.

*Table SE1. Testable implications for actigraphic data.* Data from the 135 children who wore the actigraph were used; with information being provided in relation to sleep habits and physical activity. Statistical test used depend on nature of tested variables, and therefore, T-value, F-value, Kruskal-Wallis, Chi-sq, Welch's T-values are reported Note: BMI, Body Mass Index; SES, Sociodemographic status; SDQ, Strengths and Difficulties Questionnaire; SCTUB, Smartphone computer and tablet use at bedtime; SCTUDN, Smartphone computer and tablet use during the night; School environment and Psychological well-being are Kidscreen-27 subscales.

| Testable implication                                                                                                                                                 | t-value | d.f. | p-value | Pearson corr. r | 95% C.I. for r  |
|----------------------------------------------------------------------------------------------------------------------------------------------------------------------|---------|------|---------|-----------------|-----------------|
| Cortisol levels $\perp$ School environment   BMI, Bullying, Psychological well-being, SES, Sex, Stressful events                                                     | 1.403   | 119  | 0.163   | 0.127           | (-0.052, 0.299) |
| Evening Environmental Noise $\perp$ Physical activity   SES                                                                                                          | 0.377   | 125  | 0.707   | 0.034           | (-0.141, 0.207) |
| Evening Environmental Noise $\perp$ Psychological well-being   SES                                                                                                   | -0.588  | 125  | 0.558   | -0.052          | (-0.224, 0.123) |
| Evening Environmental Noise $\perp$ SDQ   SES                                                                                                                        | -0.983  | 125  | 0.327   | -0.09           | (-0.26, 0.088)  |
| Evening Environmental Noise $\perp$ School environment                                                                                                               | 0.658   | 125  | 0.511   | 0.058           | (-0.116, 0.231) |
| Evening Environmental Noise $\perp$ BMI   SES                                                                                                                        | 0.368   | 125  | 0.714   | -0.03           | (-0.206, 0.142) |
| Evening Environmental Noise $\perp$ Victim (Bullying)   SES                                                                                                          | 0.7535  | 125  | 0.456   | 0.067           | (-0.108, 0.239) |
| Evening Environmental Noise $\perp$ Bully/Victim (Bullying)   SES                                                                                                    | 0.687   | 125  | 0.4932  | 0.061           | (-0.114, 0.233) |
| Nocturnal Environmental Noise $\perp$ Physical activity   SES                                                                                                        | -0.005  | 125  | 0.998   | -0.0004         | (-0.175, 0.173) |
| Nocturnal Environmental Noise $\perp$ Psychological well-being   SES                                                                                                 | -0.015  | 125  | 0.989   | -0.001          | (-0.175, 0.173) |
| Nocturnal Environmental Noise $\perp$ SDQ   SES                                                                                                                      | -0.674  | 125  | 0.501   | -0.06           | (-0.232, 0.115) |
| Nocturnal Environmental Noise $\perp$ School environment                                                                                                             | 0.804   | 124  | 0.423   | 0.072           | (-0.104, 0.244) |
| Nocturnal Environmental Noise $\perp$ BMI   SES                                                                                                                      | -0.791  | 125  | 0.430   | -0.07           | (-0.242, 0.105) |
| Nocturnal Environmental Noise $\perp$ Victim (Bullying)   SES                                                                                                        | -0.127  | 125  | 0.899   | -0.011          | (-0.185, 0.163) |
| Nocturnal Environmental Noise $\perp$ Bully/Victim (Bullying)   SES                                                                                                  | 0.035   | 125  | 0.972   | 0.003           | (-0.17, 0.177)  |
| BMI $\perp$ Sex   Physical activity, SES                                                                                                                             | 1.293   | 133  | 0.198   | 0.111           | (-0.059, 0.275) |
| Physical activity $\perp$ Psychological well-being   Bullying, SES, School environment                                                                               | 0.845   | 133  | 0.399   | 0.073           | (-0.01, 0.239)  |
| Physical activity $\perp$ SDQ   Bullying, SES, School environment                                                                                                    | -0.263  | 133  | 0.814   | -0.02           | (-0.189, 0.149) |
| Physical activity $\perp$ Psychological well-being   BMI, SES, Sex                                                                                                   | 0.541   | 133  | 0.59    | 0.047           | (-0.123, 0.214) |
| Physical activity $\perp$ SDQ   BMI, SES, Sex                                                                                                                        | -0.487  | 133  | 0.627   | -0.042          | (-0.210, 0.128) |
| Physical activity $\perp$ School environment                                                                                                                         | -0.515  | 133  | 0.607   | -0.045          | (-0.212, 0.125) |
| Physical activity $\perp$ Victim (Bullying)   BMI, SES, Sex                                                                                                          | -2.044  | 133  | 0.043*  | -0.17           | (-0.33, 0.006)  |
| Physical activity $\perp$ Bully/Victim (Bullying)   BMI, SES, Sex                                                                                                    | -0.676  | 133  | 0.5     | -0.059          | (-0.225, 0.111) |
| Psychological well-being $\perp$ BMI   Bullying, SES, School environment                                                                                             | -1.225  | 133  | 0.223   | -0.106          | (-0.269, 0.064) |
| Psychological well-being $\perp$ Sex   Bullying, SES, and School environment                                                                                         | -0.211  | 133  | 0.833   | -0.018          | (-0.187, 0.151) |
| SDQ $\perp$ BMI   Bullying, SES, School environment                                                                                                                  | -0.442  | 133  | 0.659   | -0.038          | (-0.206, 0.132) |
| SDQ $\perp$ Sex   Bullying, SES, and School environment                                                                                                              | 1.135   | 133  | 0.259   | 0.098           | (-0.072, 0.263) |
| School environment $\perp$ Time In Bed   Bullying, Cortisol levels, Environmental Noise, Physical activity, Psychological well-being, SES, Sex, Stressful events     | -0.499  | 112  | 0.619   | -0.047          | (-0.229, 0.138) |
| School environment $\perp$ Nocturnal Sleep   Bullying, Cortisol levels, Environmental Noise, Physical activity, Psychological well-being, SES, Sex, Stressful events | -0.01   | 112  | 0.989   | -0.001          | (-0.185, 0.183) |



| School environment $\perp$ Sleep Latency   Bullying, Cortisol levels, Environmental Noise, Physical activity, Psychological well-being, SES, Sex, Stressful events   | -0.726  | 112       | 0.482   | -0.067    | (-0.247, 0.119)    |
|----------------------------------------------------------------------------------------------------------------------------------------------------------------------|---------|-----------|---------|-----------|--------------------|
| School environment $\perp$ Sleep Efficiency  Bullying, Cortisol levels, Environmental Noise, Physical activity, Psychological well-being, SES, Sex, Stressful events | 0.587   | 112       | 0.559   | 0.055     | (-0.13, 0.239)     |
| School environment $\perp$ Diurnal Rest  Bullying, Cortisol levels, Environmental Noise, Physical activity, Psychological well-being, SES, Sex, Stressful events     | -0.247  | 112       | 0.806   | -0.02     | (-0.206, -0.161)   |
| School environment $\perp$ Time In Bed  BMI, Bullying, Psychological well-being, SES, Sex, Stressful events                                                          | -0.576  | 133       | 0.57    | -0.049    | (0.217, 0.120)     |
| School environment $\perp$ Nocturnal Sleep  BMI, Bullying, Psychological well-being, SES, Sex, Stressful events                                                      | 0.072   | 133       | 0.943   | 0.006     | (-0.163, 0.175)    |
| School environment $\perp$ Sleep Latency  BMI, Bullying, Psychological well-being, SES, Sex, Stressful events                                                        | -0.935  | 133       | 0.351   | -0.081    | (-0.246, 0.089)    |
| School environment $\perp$ Sleep Efficiency  BMI, Bullying, Psychological well-being, SES, Sex, Stressful events                                                     | 0.802   | 133       | 0.424   | 0.069     | (-0.101, 0.236)    |
| School environment $\perp$ Diurnal Rest  BMI, Bullying, Psychological well-being, SES, Sex, Stressful events                                                         | -0.542  | 133       | 0.589   | -0.047    | (-0.214, -0.123)   |
| School environment $\perp$ BMI                                                                                                                                       | 0.296   | 133       | 0.768   | 0.026     | (-0.144, 0.194)    |
| Time In Bed $\perp$ BMI   Bullying, Cortisol levels, Environmental Noise, Physical activity, Psychological well-being, SES, Sex, Stressful events                    | -0.368  | 112       | 0.713   | -0.034    | (-0.217, 0.150)    |
| Nocturnal Sleep $\perp$ BMI   Bullying, Cortisol levels, Environmental Noise, Physical activity, Psychological well-being, SES, Sex, Stressful events                | -0.595  | 112       | 0.553   | -0.06     | (-0.237, 0.129)    |
| Sleep Latency $\perp$ BMI   Bullying, Cortisol levels, Environmental Noise, Physical activity, Psychological well-being, SES, Sex, Stressful events                  | 0.28    | 112       | 0.778   | 0.026     | (-0.158, 0.209)    |
| Sleep Efficiency $\perp$ BMI   Bullying, Cortisol levels, Environmental Noise, Physical activity, Psychological well-being, SES, Sex, Stressful events               | -0.448  | 112       | 0.655   | -0.042    | (-0.224, 0.143)    |
| Diurnal Rest $\perp$ BMI   Bullying, Cortisol levels, Environmental Noise, Physical activity, Psychological well-being, SES, Sex, Stressful events                   | 0.162   | 112       | 0.871   | 0.015     | (-0.169, 0.199)    |
| Testable implication                                                                                                                                                 | F-value | d.f.      | p-value | R-squared | Adjusted R-squared |
| Cortisol levels $\perp$ SCTUB                                                                                                                                        | 1.357   | 1 and 119 | 0.246   | 0.01      | 0.002              |
| Cortisol levels $\perp$ SCTUDN                                                                                                                                       | 1.325   | 1 and 119 | 0.25    | 0.011     | 0.002              |
| Evening Environmental Noise $\perp$ SCTUB                                                                                                                            | 0.740   | 1 and 125 | 0.391   | 0.005     | -0.002             |
| Evening Environmental Noise $\perp$ SCTUDN                                                                                                                           | 0.005   | 1 and 125 | 0.946   | 0.0007    | -0.007             |
| Evening Environmental Noise $\perp$ Stressful events                                                                                                                 | 2.125   | 2 and 124 | 0.121   | 0.034     | 0.018              |
| Nocturnal Environmental Noise $\perp$ SCTUB                                                                                                                          | 0.004   | 1 and 125 | 0.95    | 0.003     | -0.008             |
| Nocturnal Environmental Noise $\perp$ SCTUDN                                                                                                                         | 0.566   | 1 and 125 | 0.453   | 0.005     | -0.003             |
| Nocturnal Environmental Noise $\perp$ Stressful events                                                                                                               | 0.945   | 2 and 124 | 0.391   | 0.015     | -0.0009            |
| Physical activity $\perp$ SCTUB                                                                                                                                      | 2.67    | 1 and 133 | 0.1     | 0.02      | 0.012              |
| Physical activity $\perp$ SCTUDN                                                                                                                                     | 3.13    | 1 and 133 | 0.08    | 0.02      | 0.015              |
| Physical activity $\perp$ Stressful events                                                                                                                           | 0.229   | 2 and 132 | 0.795   | 0.003     | -0.01              |
| SCTUB $\perp$ BMI                                                                                                                                                    | 0.04    | 1 and 133 | 0.836   | 0.0003    | -0.007             |
| SCTUDN $\perp$ BMI                                                                                                                                                   | 0.472   | 1 and 133 | 0.493   | 0.004     | -0.004             |
| Stressful events $\perp$ BMI                                                                                                                                         | 0.328   | 1 and 133 | 0.569   | 0.002     | -0.005             |
| Testable implication                                                                                                                                                 | t-value | d.f.      | p-value | R-squared | Adjusted R-squared |
| Evening Environmental Noise $\perp$ Sex                                                                                                                              | 0.729   | 108.68    | 0.474   | 0.004     | -0.003             |
| Nocturnal Environmental Noise $\perp$ Sex                                                                                                                            | 1.582   | 123.48    | 0.116   | 0.018     | 0.01               |
| SDQ $\perp$ SCTUB                                                                                                                                                    | 0.02    | 67.54     | 0.98    | 0.0001    | -0.007             |

|              |       |       |     |       |       |
|--------------|-------|-------|-----|-------|-------|
| SDQ ⊥ SCTUDN | 0.858 | 21.76 | 0.4 | 0.017 | 0.009 |
|--------------|-------|-------|-----|-------|-------|

| Testable implication                  | K.W<br>chi.sq | d.f. | p-<br>value |
|---------------------------------------|---------------|------|-------------|
| School environment ⊥ Stressful events | 1.357         | 2    | 0.507       |
| School environment ⊥ SES              | 2.96          | 4    | 0.564       |

  

| Testable implication              | W      | p-value |
|-----------------------------------|--------|---------|
| School environment ⊥ Sex          | 2389.5 | 0.42    |
| Psychological well-being ⊥ SCTUB  | 1652   | 0.985   |
| Psychological well-being ⊥ SCTUDN | 1094   | 0.791   |
| School environment ⊥ SCTUB        | 1628.5 | 0.92    |
| School environment ⊥ SCTUDN       | 1199.5 | 0.336   |

  

| Testable implication                       | χ <sup>2</sup> | d.f. | p-<br>value |
|--------------------------------------------|----------------|------|-------------|
| SCTUB ⊥ Victim (Bullying)                  | 0.361          | 1    | 0.731       |
| SCTUB ⊥ Bully/Victim (Bullying)            | 0.63           | 1    | 0.42        |
| SCTUB ⊥ SES                                | 4.236          | 4    | 0.375       |
| SCTUB ⊥ Sex                                | 4.69           | 1    | 0.045*      |
| SCTUB ⊥ Stressful events                   | 3.346          | 2    | 0.19        |
| SCTUDN ⊥ Stressful events                  | 0.479          | 2    | 0.82        |
| SCTUDN ⊥ Victim (Bullying)                 | 4.56           | 1    | 0.06        |
| SCTUDN ⊥ Bully/Victim (Bullying)           | 0.31           | 1    | 0.576       |
| SCTUDN ⊥ SES                               | 3.11           | 4    | 0.539       |
| SCTUDN ⊥ Sex                               | 5.5            | 1    | 0.06        |
| Stressful events ⊥ Victim (Bullying)       | 0.958          | 2    | 0.619       |
| Stressful events ⊥ Bully/Victim (Bullying) | 1.529          | 2    | 0.668       |
| Stressful events ⊥ SES                     | 6.197          | 4    | 0.185       |
| Stressful events ⊥ Sex                     | 2.915          | 2    | 0.233       |
| SES ⊥ Sex                                  | 0.155          | 2    | 0.926       |

Note: \*p<0.05

**Appendix SF: Testable implications for the parental reported data.**

*Table SF1. Testable implications for subjective data.* Data from all 377 children was used, with information regarding sleep habits and physical activity being estimated from questionnaires completed by parents. Statistical test used depend on nature of tested variables, and therefore, T-value, F-value, Kruskal-Wallis, Chi-sq, Welch's T-values are reported. Note: BMI, Body Mass Index; SES, Sociodemographic status; SDQ, Strengths and Difficulties Questionnaire; SCTUB, Smartphone computer and tablet use at bedtime; SCTUDN, Smartphone computer and tablet use during night-time; School environment and Psychological well-being are Kidscreen-27 subscales.

| Testable implication                                                                                             | t-value | d.f. | p-value | Pearson<br>corr. r | 95% C.I. for r   |
|------------------------------------------------------------------------------------------------------------------|---------|------|---------|--------------------|------------------|
| Cortisol levels $\perp$ School environment   BMI, Bullying, Psychological well-being, SES, Sex, Stressful events | 0.545   | 342  | 0.586   | 0.029              | (-0.076, 0.135)  |
| Evening Environmental Noise $\perp$ Physical activity   SES                                                      | -0.674  | 325  | 0.5     | -0.037             | (-0.145, 0.071)  |
| Evening Environmental Noise $\perp$ Psychological well-being   SES                                               | -0.471  | 326  | 0.638   | -0.026             | (-0.133, 0.082)  |
| Evening Environmental Noise $\perp$ SDQ   SES                                                                    | -0.328  | 324  | 0.743   | -0.018             | (-0.127, 0.09)   |
| Evening Environmental Noise $\perp$ School environment                                                           | 0.699   | 326  | 0.485   | 0.039              | (-0.07- 0.146)   |
| Evening Environmental Noise $\perp$ BMI   SES                                                                    | -1.84   | 325  | 0.1     | 0.067              | (-0.208, 0.01)   |
| Evening Environmental Noise $\perp$ Victim (Bullying)   SES                                                      | 0.95    | 326  | 0.343   | 0.053              | (-0.056, 0.16)   |
| Evening Environmental Noise $\perp$ Bully/Victim (Bullying)   SES                                                | 1.279   | 326  | 0.202   | 0.071              | ( -0.038, 0.178) |
| Nocturnal Environmental Noise $\perp$ Physical activity   SES                                                    | -0.473  | 325  | 0.636   | -0.026             | ( -0.134, 0.08)  |
| Nocturnal Environmental Noise $\perp$ Psychological well-being   SES                                             | 0.422   | 326  | 0.673   | 0.023              | (-0.085, 0.131)  |
| Nocturnal Environmental Noise $\perp$ SDQ   SES                                                                  | 0.035   | 324  | 0.972   | 0.002              | (-0.107, 0.111)  |
| Nocturnal Environmental Noise $\perp$ School environment                                                         | 1.343   | 326  | 0.18    | 0.074              | ( -0.034, 0.181) |
| Nocturnal Environmental Noise $\perp$ BMI   SES                                                                  | -1.809  | 325  | 0.07    | -0.01              | (-0.21, 0.009)   |
| Nocturnal Environmental Noise $\perp$ Victim (Bullying)   SES                                                    | 0.545   | 326  | 0.586   | 0.03               | (-0.078, 0.138)  |
| Nocturnal Environmental Noise $\perp$ Bully/Victim (Bullying)   SES                                              | 1.382   | 326  | 0.17    | 0.076              | (-0,03, 0.183)   |
| BMI $\perp$ Sex   Physical activity, SES                                                                         | 0.895   | 372  | 0.372   | 0.046              | (-0.055, 0.147)  |
| Physical activity $\perp$ Psychological well-being   Bullying, SES, School environment                           | 1.252   | 371  | 0.21    | 0.065              | (-0.037, 0.165)  |
| Physical activity $\perp$ SDQ   Bullying, SES, School environment                                                | -0.407  | 368  | 0.684   | -0.021             | (-0.123, 0.081)  |
| Physical activity $\perp$ Psychological well-being   BMI, SES, Sex                                               | 0.53    | 372  | 0.596   | 0.027              | (-0.07, 0.128)   |
| Physical activity $\perp$ SDQ   BMI, SES, Sex                                                                    | -0.855  | 369  | 0.393   | -0.044             | (-0.146, 0.057)  |
| Physical activity $\perp$ School environment                                                                     | -1.292  | 372  | 0.197   | -0.067             | (-0.167, 0.035)  |
| Physical activity $\perp$ Victim (Bullying)   BMI, SES, Sex                                                      | 0.636   | 371  | 0.525   | 0.033              | (-0.068, 0.134)  |
| Physical activity $\perp$ Bully/Victim (Bullying)   BMI, SES, Sex                                                | 1.42    | 371  | 0.158   | 0.07               | (-0.028, 0.174)  |
| Psychological well-being $\perp$ BMI   Bullying, SES, School environment                                         | -0.494  | 371  | 0.622   | -0.026             | ( -0.127, 0.076) |
| Psychological well-being $\perp$ Sex   Bullying, SES, and School environment                                     | -2.24   | 374  | 0.04*   | -0.11              | (-0.21, 0.014)   |

|                                                                                                                                                                                |         |     |       |        |                  |
|--------------------------------------------------------------------------------------------------------------------------------------------------------------------------------|---------|-----|-------|--------|------------------|
| SDQ $\perp$ BMI   Bullying, SES, School environment                                                                                                                            | 0.958   | 368 | 0.339 | 0.05   | (-0.05, 0.15)    |
| SDQ $\perp$ Sex   Bullying, SES, and School environment                                                                                                                        | 2.076   | 369 | 0.04* | 0.1    | (0.006, 0.207)   |
| School environment $\perp$ Reported Time In Bed   Bullying, Cortisol levels, Environmental Noise, Physical activity, Psychological well-being, SES, Sex, Stressful events      | 0.732   | 298 | 0.465 | 0.042  | (-0.071, 0.155)  |
| School environment $\perp$ Reported Nocturnal Sleep   Bullying, Cortisol levels, Environmental Noise, Physical activity, Psychological well-being, SES, Sex, Stressful events  | 1.23    | 299 | 0.221 | 0.071  | (-0.04, 0.18)    |
| School environment $\perp$ Reported Sleep Latency   Bullying, Cortisol levels, Environmental Noise, Physical activity, Psychological well-being, SES, Sex, Stressful events    | -0.1222 | 296 | 0.223 | -0.07  | (-0.18, 0.04)    |
| School environment $\perp$ Reported Sleep Efficiency   Bullying, Cortisol levels, Environmental Noise, Physical activity, Psychological well-being, SES, Sex, Stressful events | 1.256   | 296 | 0.21  | 0.072  | (-0.04, 0.185)   |
| School environment $\perp$ Reported Time In Bed   BMI, Bullying, Psychological well-being, SES, Sex, Stressful events                                                          | 1.057   | 365 | 0.29  | 0.055  | (-0.09, 0.259)   |
| School environment $\perp$ Reported Nocturnal Sleep   BMI, Bullying, Psychological well-being, SES, Sex, Stressful events                                                      | 1.235   | 367 | 0.22  | 0.064  | (-0.038, 0.165)  |
| School environment $\perp$ Reported Sleep Latency   BMI, Bullying, Psychological well-being, SES, Sex, Stressful events                                                        | -0.936  | 362 | 0.35  | -0.076 | (-0.04, 0.05)    |
| School environment $\perp$ Reported Sleep Efficiency   BMI, Bullying, Psychological well-being, SES, Sex, Stressful events                                                     | 0.996   | 362 | 0.32  | 0.052  | (-0.05, 0.154)   |
| School environment $\perp$ BMI                                                                                                                                                 | -0.207  | 133 | 0.836 | -0.011 | (-0.112, 0.091)  |
| Reported Time In Bed $\perp$ BMI   Bullying, Cortisol levels, Environmental Noise, Physical activity, Psychological well-being, SES, Sex, Stressful events                     | -1.78   | 298 | 0.08  | -0.1   | (-0.213, -0.011) |
| Reported Nocturnal Sleep $\perp$ BMI   Bullying, Cortisol levels, Environmental Noise, Physical activity, Psychological well-being, SES, Sex, Stressful events                 | -1.683  | 299 | 0.09  | -0.01  | (-0.20, 0.01)    |
| Reported Sleep Latency $\perp$ BMI   Bullying, Cortisol levels, Environmental Noise, Physical activity, Psychological well-being, SES, Sex, Stressful events                   | 0.62    | 296 | 0.872 | 0.009  | (-0.104, 0.123)  |
| Reported Sleep Efficiency $\perp$ BMI   Bullying, Cortisol levels, Environmental Noise, Physical activity, Psychological well-being, SES, Sex, Stressful events                | -0.287  | 296 | 0.77  | -0.017 | (-0.13, 0.097)   |

| Testable implication                                 | F-value | d.f.      | p-value | R-squared | Adjusted R-squared |
|------------------------------------------------------|---------|-----------|---------|-----------|--------------------|
| Cortisol levels $\perp$ SCTUB                        | 0.356   | 1 and 344 | 0.474   | 0.001     | -0,001             |
| Cortisol levels $\perp$ SCTUDN                       | 0.137   | 1 and 344 | 0.711   | 0.0003    | -0,002             |
| Evening Environmental Noise $\perp$ SCTUB            | 3.26    | 1 and 326 | 0.07    | 0.01      | 0,006              |
| Evening Environmental Noise $\perp$ SCTUDN           | 0.855   | 1 and 326 | 0.36    | 0.002     | 0,36               |
| Evening Environmental Noise $\perp$ Stressful events | 0.511   | 2 and 325 | 0.6     | 0.003     | -0,003             |
| Nocturnal Environmental Noise $\perp$ SCTUB          | 3.01    | 1 and 326 | 0.08    | 0.01      | 0,08               |
| Nocturnal Environmental Noise $\perp$ SCTUDN         | 0.76    | 1 and 326 | 0.38    | 0.002     | -0,007             |

| Nocturnal Environmental Noise ⊥ Stressful events | 0.369          | 2 and 325 | 0.692   | 0.002     | -0,003             |
|--------------------------------------------------|----------------|-----------|---------|-----------|--------------------|
| Physical activity ⊥ SCTUB                        | 0.11           | 1 and 372 | 0.74    | 0.0003    | -0,002             |
| Physical activity ⊥ SCTUDN                       | 3.6            | 1 and 372 | 0.06    | 0.009     | 0,007              |
| Physical activity ⊥ Stressful events             | 1.44           | 2 and 371 | 0.24    | 0.008     | 0,002              |
| SCTUB ⊥ BMI                                      | 0.09           | 1 and 372 | 0.758   | 0.0002    | -0,002             |
| SCTUDN ⊥ BMI                                     | 1.63           | 1 and 372 | 0.203   | 0.004     | 0,001              |
| Stressful events ⊥ BMI                           | 1.41           | 2 and 371 | 0.246   | 0.007     | 0,002              |
| Testable implication                             | t-value        | d.f.      | p-value | R-squared | Adjusted R-squared |
| Evening Environmental Noise ⊥ Sex                | 0.977          | 303.48    | 0.33    | 0.003     | -0,0001            |
| Nocturnal Environmental Noise ⊥ Sex              | -0.363         | 320.01    | 0.72    | 0.0003    | -0,002             |
| SDQ ⊥ SCTUB                                      | -0.923         | 138.65    | 0.36    | 0.002     | -0,001             |
| SDQ ⊥ SCTUDN                                     | -1.26          | 60.5      | 0.21    | 0.006     | 0,003              |
| Testable implication                             | W              | p-value   |         |           |                    |
| School environment ⊥ Sex                         | 20018          | 0.463     |         |           |                    |
| Psychological well-being ⊥ SCTUB                 | 13854          | 0.1       |         |           |                    |
| Psychological well-being ⊥ SCTUDN                | 9214.5         | 0.21      |         |           |                    |
| School environment ⊥ SCTUB                       | 13156          | 0.39      |         |           |                    |
| School environment ⊥ SCTUDN                      | 8984           | 0.35      |         |           |                    |
| Testable implication                             | K.W chi.sq     | d.f.      | p-value |           |                    |
| School environment ⊥ Stressful events            | 2.489          | 2         | 0.29    |           |                    |
| School environment ⊥ SES                         | 1.31           | 4         | 0.86    |           |                    |
| Testable implication                             | χ <sup>2</sup> | d.f.      | p-value |           |                    |
| SCTUB ⊥ Victim (Bullying)                        | 0.66           | 1         | 0.417   |           |                    |
| SCTUB ⊥ Bully/Victim (Bullying)                  | 0.28           | 1         | 0.595   |           |                    |
| SCTUB ⊥ SES                                      | 5.406          | 4         | 0.06    |           |                    |
| SCTUB ⊥ Sex                                      | 1.53           | 1         | 0.22    |           |                    |
| SCTUB ⊥ Stressful events                         | 0.373          | 2         | 0.83    |           |                    |
| SCTUDN ⊥ Stressful events                        | 0.58           | 2         | 0.75    |           |                    |
| SCTUDN ⊥ Victim (Bullying)                       | 1.364          | 1         | 0.30    |           |                    |
| SCTUDN ⊥ Bully/Victim (Bullying)                 | 0.283          | 1         | 0.96    |           |                    |
| SCTUDN ⊥ SES                                     | 2.13           | 4         | 0.71    |           |                    |
| SCTUDN ⊥ Sex                                     | 2.86           | 1         | 0.09    |           |                    |
| Stressful events ⊥ Victim (Bullying)             | 2.06           | 2         | 0.36    |           |                    |
| Stressful events ⊥ Bully/Victim (Bullying)       | 1.17           | 2         | 0.55    |           |                    |
| Stressful events ⊥ SES                           | 6.72           | 8         | 0.567   |           |                    |
| Stressful events ⊥ Sex                           | 1.53           | 2         | 0.47    |           |                    |
| SES ⊥ Sex                                        | 5.97           | 4         | 0.201   |           |                    |

Note: \*p<0.05

## Appendix SG: Direct effects of evening and nocturnal environmental noise on sleep habits

**Table SG1:** Direct effect of evening and nocturnal environmental noise on sleep habits, measured by actigraph. Not standardized B-estimates and 95% confidence intervals are shown.

(a) Adjusted for bully/victim propensity (bullying), hair cortisol level, objective physical activity, psychological well-being as measured by the Kidscreen 27, socioeconomic status, sex and number of

|                        |               |                               | Time In Bed |                 | Nocturnal Sleep |                 | Sleep Latency |                 | Sleep Efficiency |              | Diurnal Rest |                 |
|------------------------|---------------|-------------------------------|-------------|-----------------|-----------------|-----------------|---------------|-----------------|------------------|--------------|--------------|-----------------|
| Model 2 <sup>(a)</sup> | Direct effect | Evening Environmental Noise   | -0.0060     | (-0.025, 0.014) | -0.0001         | (-0.019, 0.019) | -0.0050       | (-0.019, 0.08)  | 0.05             | (-0.8, 0.2)  | -0.0080      | (-0.029, 0.011) |
|                        |               | Nocturnal Environmental Noise | -0.0180     | (-0.038, 0.003) | -0.0120         | (-0.03, 0.007)  | -0.0060       | (-0.02, 0.008)  | 0.03             | (-0.1, 0.17) | -0.0001      | (-0.02, 0.019)  |
| Model 3 <sup>(b)</sup> | Direct effect | Evening Environmental Noise   | -0.0020     | (-0.022, 0.018) | 0.0020          | (-0.016, 0.021) | -0.0050       | (-0.018, 0.008) | 0.05             | (-0.08, 0.2) | -0.0090      | (-0.029, 0.012) |
|                        |               | Nocturnal Environmental Noise | -0.0170     | (-0.038, 0.004) | -0.0110         | (-0.03, 0.009)  | -0.0060       | (-0.02, 0.008)  | 0.03             | (-0.1, 0.2)  | -0.0001      | (-0.022, 0.021) |
| Model 4 <sup>(c)</sup> | Direct effect | Evening Environmental Noise   | -0.0050     | (-0.024, 0.015) | 0.0020          | (-0.017, 0.020) | -0.0063       | (-0.019, 0.006) | 0.06             | (-0.07, 0.2) | -0.0097      | (-0.03, 0.01)   |
|                        |               | Nocturnal Environmental Noise | -0.0180     | (-0.039, 0.003) | -0.0120         | (-0.03, 0.008)  | -0.0060       | (-0.02, 0.008)  | 0.04             | (-0.1, 0.2)  | -0.0001      | (-0.022, 0.021) |

stressful events.

(b) Adjusted for victim propensity (bullying), hair cortisol level, objective physical activity, psychological well-being as measured by the SDQ, socioeconomic status, sex and number of stressful events.

(c) Adjusted for bully/victim propensity (bullying), hair cortisol level, objective physical activity, psychological well-being as measured by the SDQ, socioeconomic status, sex and number of stressful events.

**Table SG2:** Direct effect of evening and nocturnal environmental noise on sleep habits, measured subjectively. Not standardized B-estimates and 95% confidence intervals are shown.

|                        |               |                               | Reported Time In Bed |                 | Reported Nocturnal Sleep |                 | Reported Sleep Latency |                 | Reported Sleep Efficiency |               |
|------------------------|---------------|-------------------------------|----------------------|-----------------|--------------------------|-----------------|------------------------|-----------------|---------------------------|---------------|
| Model 2 <sup>(a)</sup> | Direct effect | Evening Environmental Noise   | 0.0050               | (-0.002, 0.013) | 0.0080                   | (-0.001, 0.017) | -0.0020                | (-0.01, 0.004)  | 0.03                      | (-0.04, 0.1)  |
|                        |               | Nocturnal Environmental Noise | 0.0050               | (-0.004, 0.013) | 0.0070                   | (-0.002, 0.016) | -0.0030                | (-0.01, 0.005)  | 0.03                      | (-0.4, 0.1)   |
| Model 3 <sup>(b)</sup> | Direct effect | Evening Environmental Noise   | 0.0050               | (-0.002, 0.013) | 0.0070                   | (-0.002, 0.016) | -0.0020                | (-0.009, 0.005) | 0.02                      | (-0.4, 0.09)  |
|                        |               | Nocturnal Environmental Noise | 0.0050               | (-0.003, 0.013) | 0.0070                   | (-0.002, 0.016) | -0.0020                | (-0.009, 0.006) | 0.02                      | (-0.5, 0.1)   |
| Model 4 <sup>(c)</sup> | Direct effect | Evening Environmental Noise   | 0.0050               | (-0.002, 0.013) | 0.0070                   | (-0.002, 0.016) | -0.0020                | (-0.009, 0.005) | 0.02                      | (-0.05, 0.09) |
|                        |               | Nocturnal Environmental Noise | 0.0050               | (-0.004, 0.013) | 0.0070                   | (-0.002, 0.016) | -0.0020                | (-0.009, 0.006) | 0.02                      | (-0.05, 0.09) |

(a) Adjusted for bully/victim propensity (bullying), hair cortisol level, subjective physical activity, psychological well-being as measured by the Kidscreen 27, socioeconomic status, sex and number of stressful events.

(b) Adjusted for victim propensity (bullying), hair cortisol level, subjective physical activity, psychological well-being as measured by the SDQ, socioeconomic status, sex and number of stressful events.

(c) Adjusted for bully/victim propensity (bullying), hair cortisol level, subjective physical activity, psychological well-being as measured by the SDQ, socioeconomic status, sex and number of stressful events.
